# Supplementary material
Source: PubMed Central journal article supplement (PMC5506419)
Supplement: IMM-151-451-s001.pdf [file IMM-151-451-s001.pdf]

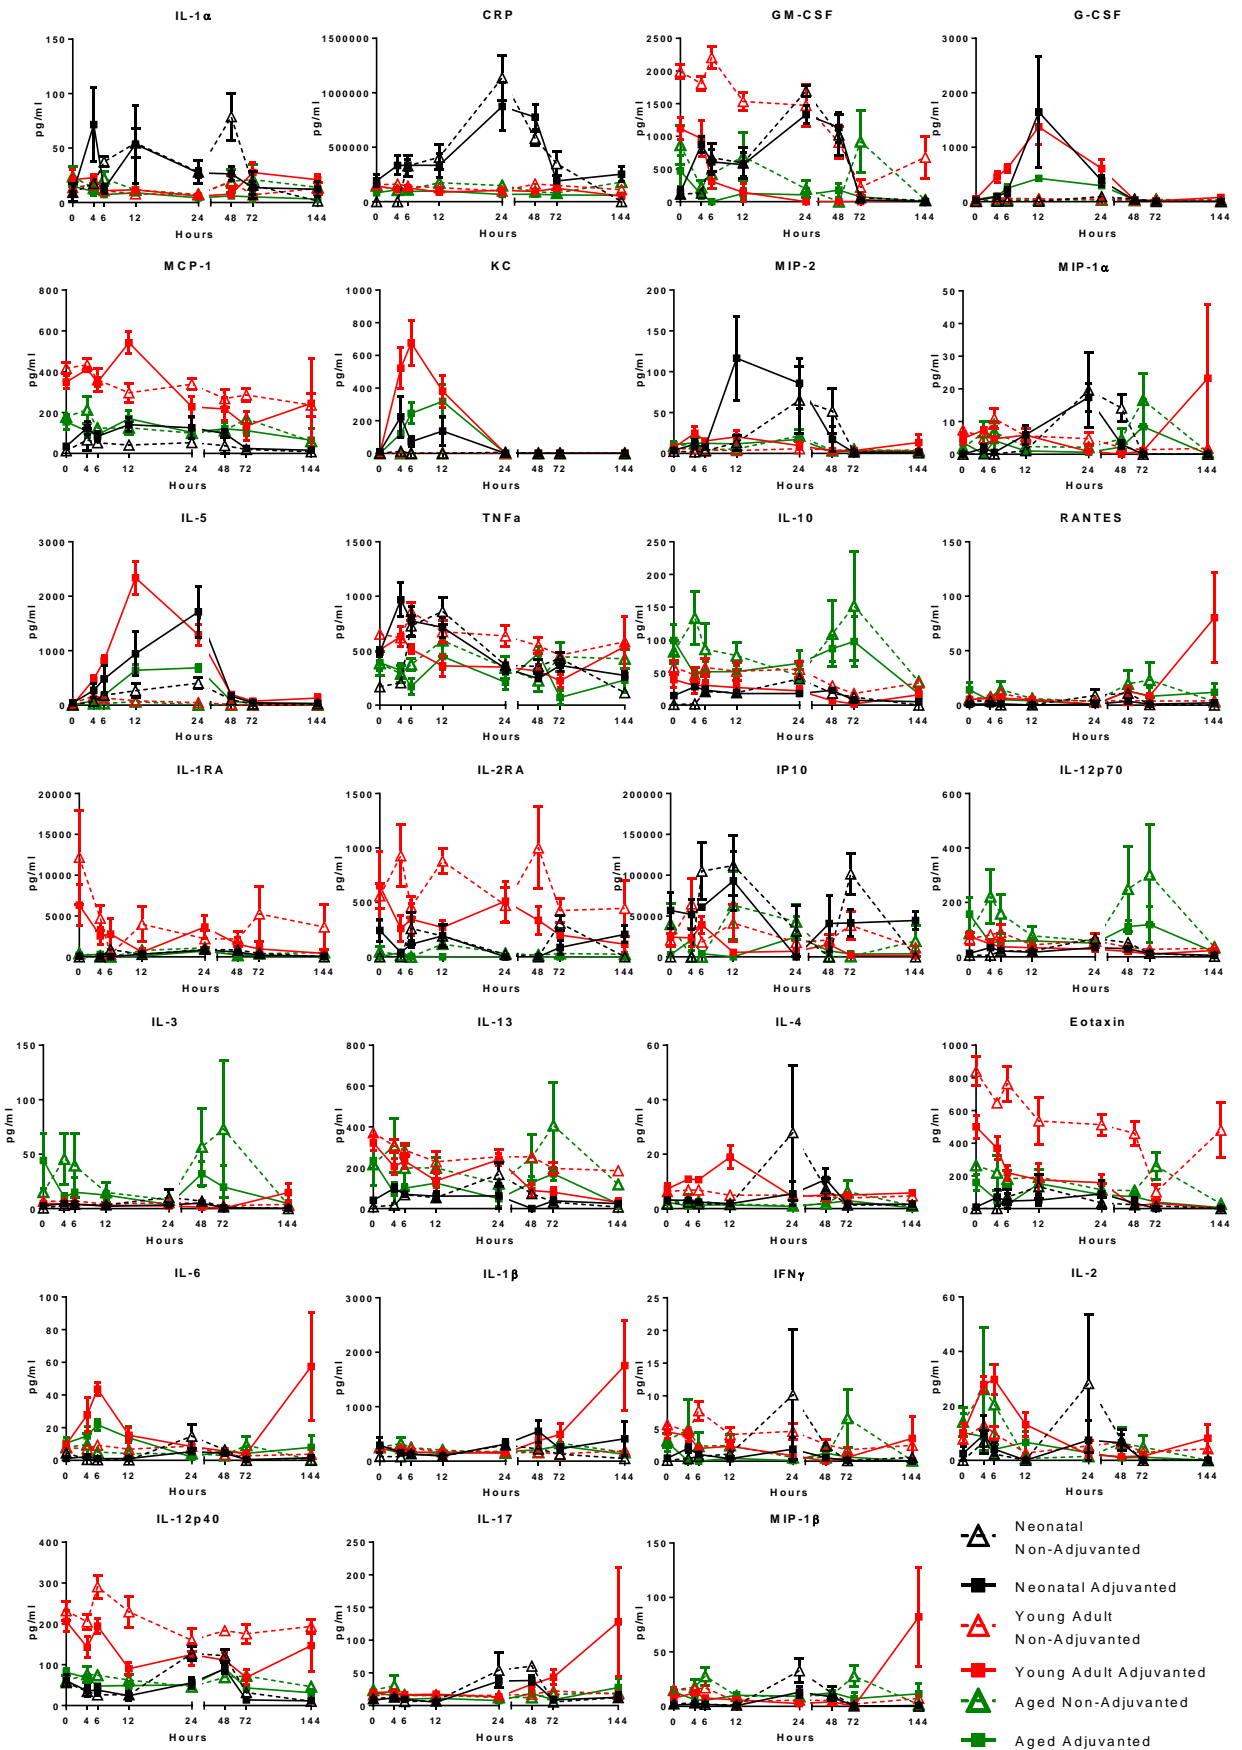

**Figure S1. Age affects the cytokine response in the blood to booster vaccination.** Mice that received a prime immunisation as neonatal (7 day old), young adult (6-8 weeks) and elderly (16 months) mice were immunised a second time intramuscularly (i.m.) with or without MF59 adjuvant. Serum cytokine levels were measured over 6 days. Data points represent n=5 animals +/- SEM.
